# Supplementary material
Source: PubMed Central journal article supplement (PMC6005015)
Supplement: djx253_supp.pdf [file djx253_supp.pdf]

## APPENDIX

Using the nomogram for OS in Figure 1A, an example patient's predictions may be obtained from a single nomogram as follows. First, risk points associated with each variable are obtained via vertical translation of the patient's variable value (e.g., BRAF) to the scale labeled "Points" in the nomogram (i.e., BRAF MT status contributes approximately 29 points to risk of death). Next, the points associated with each variable value for the patient are totaled across the variables. This total is then located on the scale "Total Points" and then vertically mapped to obtain the prediction of interest (e.g., 140 Total Points maps to a 1-Year OS probability of approximately 69%). Instructions also apply to the PFS nomogram in Figure 1B.

**Supplemental Table 1.** ARCAD trials used for nomogram construction and validation.

| <b>Trial</b>          | <b>Years<br/>Accrued</b> | <b>First Line Treatment Arms</b>                                                          | <b>N</b>      |
|-----------------------|--------------------------|-------------------------------------------------------------------------------------------|---------------|
| <b>03-TTD-01</b>      | 2002-2004                | FUOX vs. CAPOX                                                                            | 342           |
| <b>AGITG (MAX)</b>    | 2005-2007                | Capecitabine vs. capecitabine + bevacizumab<br>vs. capecitabine + bevacizumab + mitomycin | 471           |
| <b>AIO22</b>          | 2002-2004                | FUFOX vs. CAPOX                                                                           | 470           |
| <b>AVF2107g</b>       | 2000-2002                | IFL vs. IFL + bevacizumab                                                                 | 923           |
| <b>AVF2192g</b>       | 2000-2002                | 5-FU vs. 5-FU + bevacizumab                                                               | 209           |
| <b>BICC-C</b>         | 2003-2004                | mIFL +/- bevacizumab vs.<br>FOLFIRI +/- bevacizumab vs. CapIRI                            | 532           |
| <b>C97-3</b>          | 1997-1999                | FOLFOX6 vs. FOLFIRI                                                                       | 220           |
| <b>CAIRO</b>          | 2003-2004                | Capecitabine vs. CapIRI                                                                   | 820           |
| <b>CAIRO2</b>         | 2005-2006                | CAPOX + bevacizumab vs.<br>CAPOX + bevacizumab + cetuximab                                | 746           |
| <b>COIN</b>           | 2005-2008                | FOLFOX vs. FOLFOX + cetuximab vs.<br>intermittent FOLFOX                                  | 2,418         |
| <b>CRYSTAL</b>        | 2004-2005                | FOLFIRI + cetuximab vs. FOLFIRI                                                           | 1,217         |
| <b>FIRE II (CIOX)</b> | 2004-2006                | XELOX + cetuximab vs. CapIRI + cetuximab                                                  | 177           |
| <b>FIRE III</b>       | 2007-2012                | FOLFIRI + bevacizumab vs.<br>FOLFIRI + cetuximab                                          | 592           |
| <b>FOCUS</b>          | 2000-2003                | 5-FU vs. 5-FU + oxaliplatin vs.<br>5-FU + irinotecan                                      | 2,103         |
| <b>FOCUS II</b>       | 2004-2006                | 5-FU vs. FOLFOX vs. capecitabine vs. CAPOX                                                | 397           |
| <b>GONO</b>           | 2001-2005                | FOLFOXIRI vs. FOLFIRI                                                                     | 244           |
| <b>HORG 99.30</b>     | 2000-2004                | FOLFOXIRI vs. FOLFIRI                                                                     | 283           |
| <b>HORIZON II</b>     | 2006-2010                | FOLFOX + CAPOX + cediranib vs.<br>FOLFOX + CAPOX                                          | 1,076         |
| <b>HORIZON III</b>    | 2006-2009                | FOLFOX + cediranib vs.<br>FOLFOX + bevacizumab                                            | 1,601         |
| <b>MACRO</b>          | 2006-2008                | XELOX + bevacizumab vs. bevacizumab                                                       | 476           |
| <b>N016966</b>        | 2004-2005                | FOLFOX + CAPOX + bevacizumab vs.<br>FOLFOX + CAPOX                                        | 2,034         |
| <b>N9741</b>          | 1999-2001                | IFL vs. FOLFOX vs. IROX                                                                   | 1,416         |
| <b>OPTIMOX 1</b>      | 2000-2002                | FOLFOX4 vs. FOLFOX7                                                                       | 621           |
| <b>OPTIMOX 2</b>      | 2004-2006                | mFOLFOX7 vs. mFOLFOX7                                                                     | 202           |
| <b>OPUS</b>           | 2005-2006                | FOLFOX4 vs. FOLFOX4 + cetuximab                                                           | 340           |
| <b>PACCE (C249)</b>   | 2005-2006                | Chemotherapy + bevacizumab vs.<br>Chemotherapy + bevacizumab + panitumumab                | 1,053         |
| <b>PRIME (C203)</b>   | 2006-2008                | FOLFOX vs. FOLFOX + panitumumab                                                           | 1,183         |
| <b>TRIBE</b>          | 2008-2011                | FOLFIRI + bevacizumab vs.<br>FOLFOXIRI + bevacizumab                                      | 508           |
| <b>Total ARCAD</b>    |                          |                                                                                           | <b>22,674</b> |

Abbreviations: AGITG, Australasian Gastro-Intestinal Trials Group; AIO, Arbeitsgemeinschaft Internistische Onkologie; ARCAD, Aide et Recherche en Cancérologie Digestive; AVF, anastomotic-vaginal fistula; BICC, Breast Cancer in City and Country; CAIRO, Capecitabine, Irinotecan, and Oxaliplatin in Advanced Colorectal Cancer; CapIRI, capecitabine and irinotecan; CAPOX, capecitabine plus oxaliplatin; FOCUS, Fluorouracil, Oxaliplatin, and CPT11 Use and Sequencing; FOLFIRI, fluorouracil, leucovorin, and irinotecan; FOLFOX, fluorouracil, leucovorin, and oxaliplatin; FU, fluorouracil; FUFOX, fluorouracil plus oxaliplatin; FUOX, continuous-infusion high-dose fluorouracil (FU) plus oxaliplatin; GONO, Gruppo Oncologico Nord Ovest; HORG, Hellenic Oncology Research Group; IFL, irinotecan, leucovorin, and fluorouracil; IROX, irinotecan and oxaliplatin; m, modified; MACRO, Maintenance in Colorectal Cancer; PACCE, Panitumumab Advanced Colorectal Cancer Evaluation; XELOX, capecitabine plus oxaliplatin; 5-FU, fluorouracil and leucovorin.
